# Supplementary material
Source: PubMed Central journal article supplement (PMC2818889)
Supplement: 0909603107_pnas.200909603SI.pdf [file 0909603107_pnas.200909603SI.pdf]

# Supporting Information

Kiso et al. 10.1073/pnas.0909603107

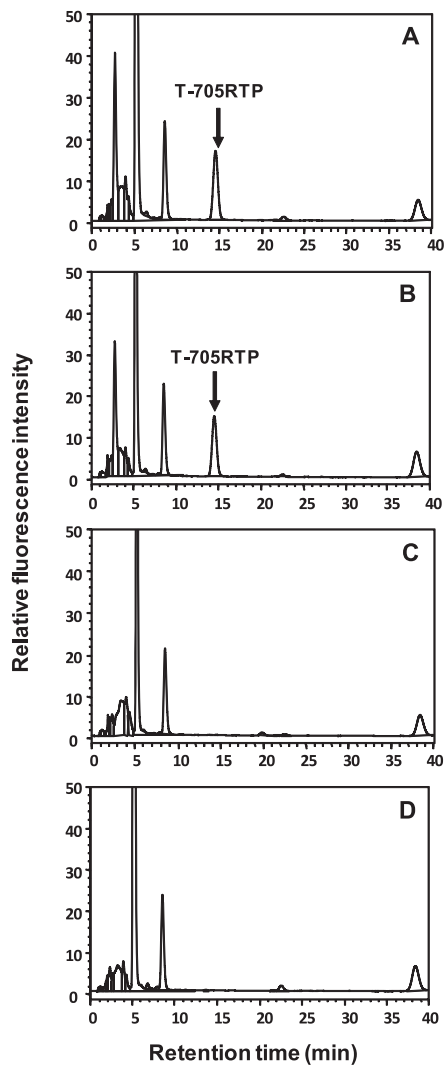

**Fig. S1.** Chromatogram of cellular extracts from T-705-treated A549 cells. The intracellular phosphorylation profile of T-705 in A549 cells treated with 5  $\mu$ M T-705 alone (A), or in combination with 50  $\mu$ M thymidine (B), adenosine (C), or guanosine (D) for 24 h was evaluated by fluorescence chromatogram analysis. The retention time of the pure standard of T-705RTP was 14.6 min.

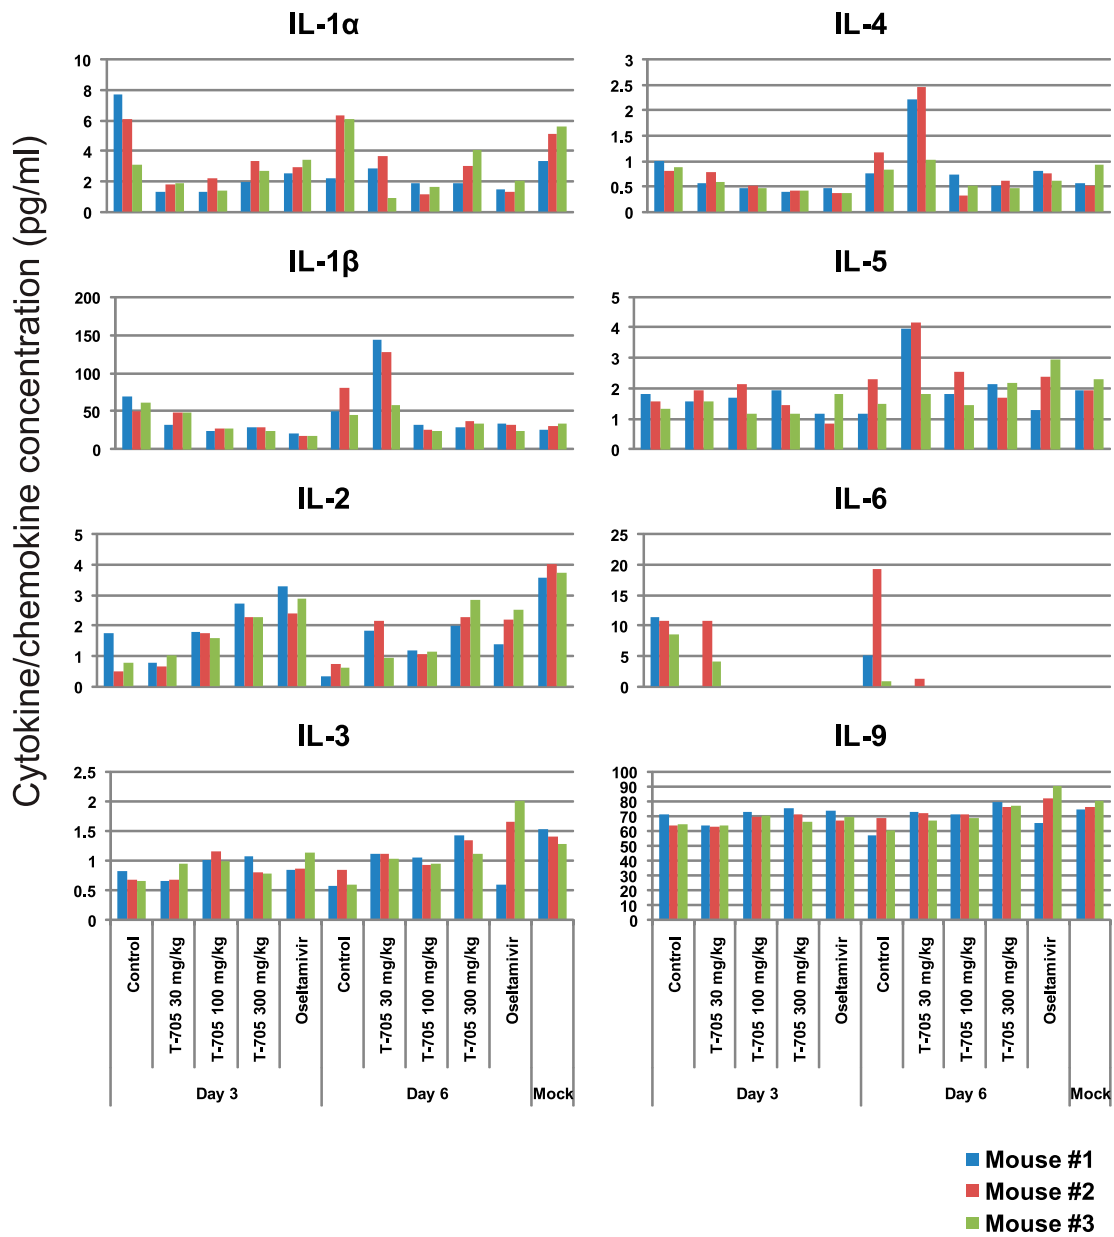

**Fig. S2.** Proinflammatory cytokines/chemokines in the lungs of infected mice. The concentrations of various cytokines/chemokines in the lungs of infected mice on days 3 and 6 postinfection were measured by protein array analysis with the Bio-Plex Mouse Cytokine 23-Plex and 9-Plex panel (Bio-Rad laboratories), with the exception of IFN- $\alpha$  and - $\beta$  measurements, which were done by ELISA with the Mouse IFN Alpha or Beta ELISA Kit (Invitrogen). We were unable to detect IL-12 (p70), IL-13, or IL-15. IL-18 data are not available because of a technical problem with the manufacturer.



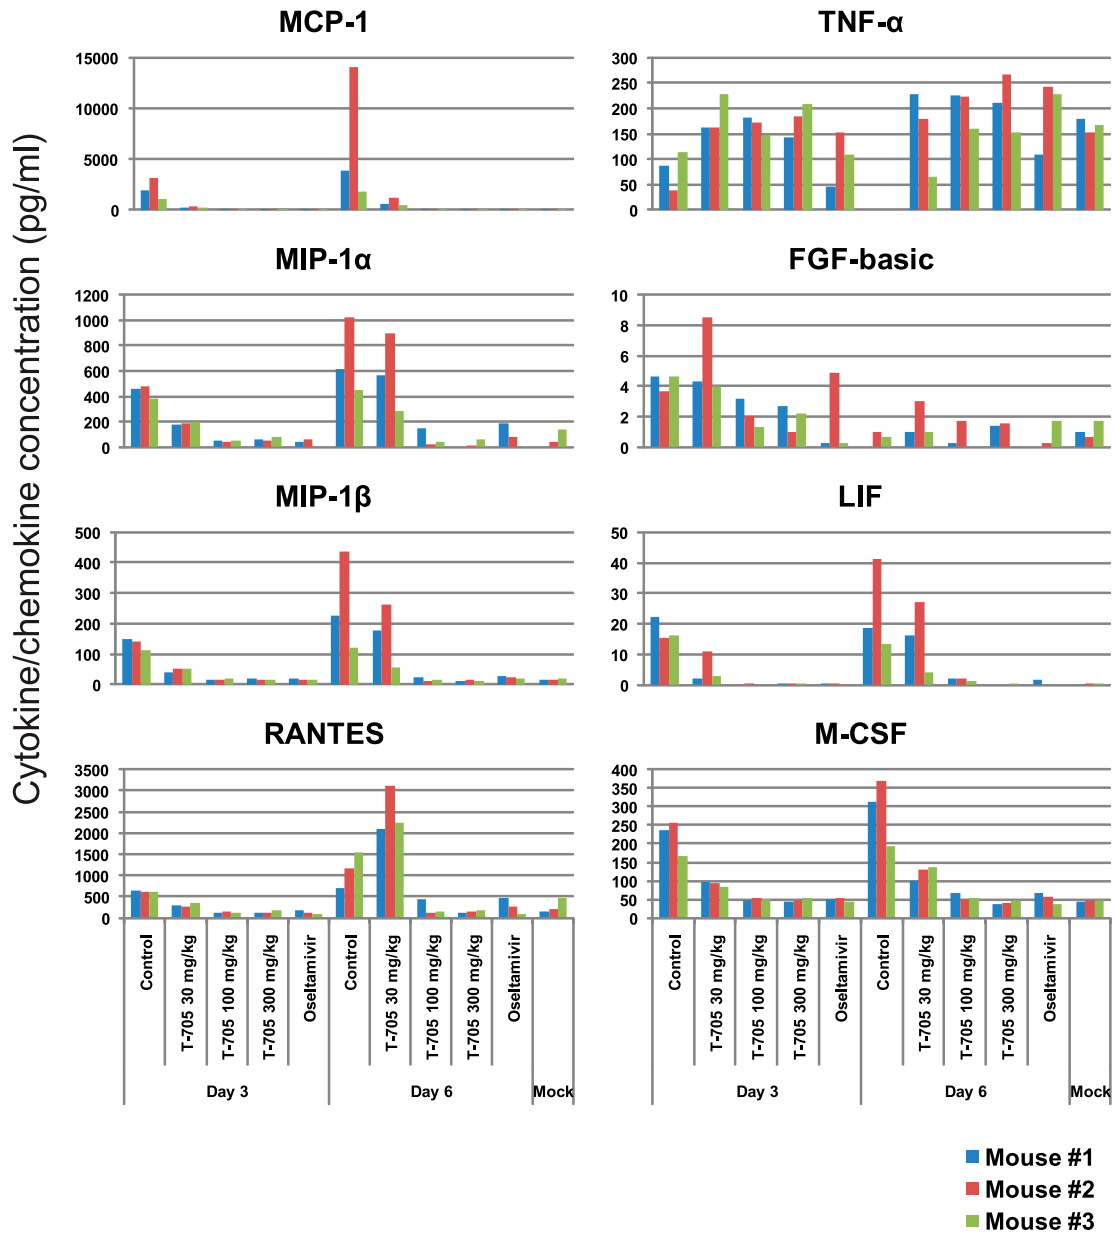

Fig. S2. continued.
